# Supplementary material for: Recent Advances in Grayanane Diterpenes: Isolation, Structural Diversity, and Bioactivities from Ericaceae Family (2018–2024)
Source: MDPI journal article supplement (doi:10.3390/molecules29071649), 2024-04-06
Supplement: s1 [file s1]

Table S1. Compound names, plant resources, related references, and published year.

| No. | Name                                | Plant resource                                 | Year | ref |
|-----|-------------------------------------|------------------------------------------------|------|-----|
| 1   | Pierisformosoid A                   | <i>Pieris formosa</i> , roots                  | 2018 | 8   |
| 2   | Pierisformosoid B                   | <i>Pieris formosa</i> , roots                  | 2018 | 8   |
| 3   | Pierisformosoid C                   | <i>Pieris formosa</i> , roots                  | 2018 | 8   |
| 4   | Pierisformosoid D                   | <i>Pieris formosa</i> , roots                  | 2018 | 8   |
| 5   | Pierisformosoid E                   | <i>Pieris formosa</i> , roots                  | 2018 | 8   |
| 6   | Pierisformosoid F                   | <i>Pieris formosa</i> , roots                  | 2018 | 8   |
| 7   | Pierisformosoid G                   | <i>Pieris formosa</i> , roots                  | 2018 | 8   |
| 8   | Pierisformosoid H                   | <i>Pieris formosa</i> , roots                  | 2018 | 8   |
| 9   | Pierisformosoid I                   | <i>Pieris formosa</i> , roots                  | 2018 | 8   |
| 10  | Pierisformosoid J                   | <i>Pieris formosa</i> , roots                  | 2018 | 8   |
| 11  | Pierisformosoid K                   | <i>Pieris formosa</i> , roots                  | 2018 | 8   |
| 12  | Pierisformosoid L                   | <i>Pieris formosa</i> , roots                  | 2018 | 8   |
| 13  | 3-epi-grayanoside B                 | <i>Rhododendron micranthum</i> , leaves        | 2018 | 9   |
| 14  | Micranthanoside A                   | <i>Rhododendron micranthum</i> , leaves        | 2018 | 9   |
| 15  | Micranthanoside B                   | <i>Rhododendron micranthum</i> , leaves        | 2018 | 9   |
| 16  | Micranthanoside C                   | <i>Rhododendron micranthum</i> , leaves        | 2018 | 9   |
| 17  | Micranthanoside D                   | <i>Rhododendron micranthum</i> , leaves        | 2018 | 9   |
| 18  | Micranthanoside E                   | <i>Rhododendron micranthum</i> , leaves        | 2018 | 9   |
| 19  | hydroxygrayanoside C                | <i>Rhododendron micranthum</i> , leaves        | 2018 | 9   |
| 20  | micranthanoside F                   | <i>Rhododendron micranthum</i> , leaves        | 2018 | 9   |
| 21  | 14 $\beta$ -acetyoxymicranthanoside | <i>Rhododendron micranthum</i> , leaves        | 2018 | 9   |
| 22  | micranthanoside G                   | <i>Rhododendron micranthum</i> , leaves        | 2018 | 9   |
| 23  | 14-Oacetylmicranthanoside G         | <i>Rhododendron micranthum</i> , leaves        | 2018 | 9   |
| 24  | 14 $\beta$ -hydroxypieroside A      | <i>Rhododendron micranthum</i> , leaves        | 2018 | 9   |
| 25  | micranthanoside H                   | <i>Rhododendron micranthum</i> , leaves        | 2018 | 9   |
| 26  | Mollfoliagin D                      | <i>Rhododendron molle</i> , leaves             | 2018 | 7   |
| 27  | 6-O-Acetyl rhodomollein XI          | <i>Rhododendron molle</i> , leaves             | 2018 | 7   |
| 28  | Mollfoliagin F                      | <i>Rhododendron molle</i> , leaves             | 2018 | 7   |
| 29  | 18-Hydroxygrayanotoxin XVIII        | <i>Rhododendron molle</i> , leaves             | 2018 | 7   |
| 30  | 2-O-Methyl rhodomolin I             | <i>Rhododendron molle</i> , leaves             | 2018 | 7   |
| 31  | 2-O-Methyl rhodomollein XII         | <i>Rhododendron molle</i> , leaves             | 2018 | 7   |
| 32  | 2-O-Methyl rhodojaponin VI          | <i>Rhododendron molle</i> , leaves             | 2018 | 7   |
| 33  | 2-O-Methyl rhodojaponin VII         | <i>Rhododendron molle</i> , leaves             | 2018 | 7   |
| 34  | Rhododecorumin VIII                 | <i>Rhododendron decorum</i> , leaves and twigs | 2018 | 22  |
| 35  | Rhododecorumin IX                   | <i>Rhododendron decorum</i> , leaves and twigs | 2018 | 22  |
| 36  | Rhododecorumin X                    | <i>Rhododendron decorum</i> , leaves and twigs | 2018 | 22  |
| 37  | Rhododecorumin XI                   | <i>Rhododendron decorum</i> , leaves and twigs | 2018 | 22  |
| 38  | Rhododecorumin XII                  | <i>Rhododendron decorum</i> , leaves and twigs | 2018 | 22  |
| 39  | Rhododeoside I                      | <i>Rhododendron decorum</i> , leaves and twigs | 2018 | 22  |
| 40  | Rhodoauriculatol I                  | <i>Rhododendron auriculatum</i> , leaves       | 2019 | 21  |
| 41  | Rhodomicranoside F                  | <i>Rhododendron auriculatum</i> , leaves       | 2019 | 14  |
| 42  | Rhodomicranoside G                  | <i>Rhododendron auriculatum</i> , leaves       | 2019 | 14  |
| 43  | Rhodomicranoside H                  | <i>Rhododendron auriculatum</i> , leaves       | 2019 | 14  |
| 44  | Rhodomicranoside I                  | <i>Rhododendron auriculatum</i> , leaves       | 2019 | 14  |
| 45  | Auriculatol B                       | <i>Rhododendron auriculatum</i> , leaves       | 2019 | 25  |
| 46  | 3-epi-Grayanotoxin XVIII            | <i>Rhododendron auriculatum</i> , leaves       | 2019 | 25  |
| 47  | 6-Deoxycraibiotoxin I               | <i>Rhododendron auriculatum</i> , leaves       | 2019 | 25  |
| 48  | 3-epi-Auriculatol B                 | <i>Rhododendron auriculatum</i> , leaves       | 2019 | 25  |
| 49  | 19-Hydroxy-3-epi-auriculatol B      | <i>Rhododendron auriculatum</i> , leaves       | 2019 | 25  |
| 50  | Auriculatol C                       | <i>Rhododendron auriculatum</i> , leaves       | 2019 | 25  |
| 51  | Auriculatol D                       | <i>Rhododendron auriculatum</i> , leaves       | 2019 | 25  |
| 52  | Auriculatol E                       | <i>Rhododendron auriculatum</i> , leaves       | 2019 | 25  |
| 53  | Auriculatol F                       | <i>Rhododendron auriculatum</i> , leaves       | 2019 | 25  |

|     |                                                                                       |                                                |      |    |
|-----|---------------------------------------------------------------------------------------|------------------------------------------------|------|----|
| 54  | 2 $\alpha$ -Hydroxyauriculatol F                                                      | <i>Rhododendron auriculatum</i> , leaves       | 2019 | 25 |
| 55  | 1-epi-Pieristoxin S                                                                   | <i>Rhododendron auriculatum</i> , leaves       | 2019 | 25 |
| 56  | 17-Hydroxygrayanotoxin XIX                                                            | <i>Pieris japonica</i> , leaves                | 2019 | 26 |
| 57  | 2-O-Methylrhodomollein XIX                                                            | <i>Pieris japonica</i> , leaves                | 2019 | 26 |
| 58  | 17-Hydroxy-3-epi-auriculatol B                                                        | <i>Pieris japonica</i> , leaves                | 2019 | 26 |
| 59  | Pierisjaponol A                                                                       | <i>Pieris japonica</i> , leaves                | 2019 | 26 |
| 60  | Pierisjaponol B                                                                       | <i>Pieris japonica</i> , leaves                | 2019 | 26 |
| 61  | 13 $\alpha$ -Hydroxyrhodomollein XVII                                                 | <i>Pieris japonica</i> , leaves                | 2019 | 26 |
| 62  | 12 $\beta$ -Hydroxygrayanotoxin XVIII                                                 | <i>Pieris japonica</i> , leaves                | 2019 | 26 |
| 63  | 2 $\alpha$ -Hydroxyasebotoxin II                                                      | <i>Pieris japonica</i> , leaves                | 2019 | 26 |
| 64  | 2 $\alpha$ -O-Methylgrayanotoxin II                                                   | <i>Pieris japonica</i> , leaves                | 2019 | 26 |
| 65  | Pierisjaponol C                                                                       | <i>Pieris japonica</i> , leaves                | 2019 | 26 |
| 66  | 16-O-Methylgrayanotoxin XVIII                                                         | <i>Pieris japonica</i> , leaves                | 2019 | 26 |
| 67  | Pierisjaponol D                                                                       | <i>Pieris japonica</i> , leaves                | 2019 | 26 |
| 68  | Rhodomollein XLIV                                                                     | <i>Rhododendron molle</i> , flowers            | 2020 | 20 |
| 69  | Rhodomollein XLV                                                                      | <i>Rhododendron molle</i> , flowers            | 2020 | 20 |
| 70  | Rhodomollein XLVI                                                                     | <i>Rhododendron molle</i> , flowers            | 2020 | 20 |
| 71  | Rhodomollein XLVII                                                                    | <i>Rhododendron molle</i> , flowers            | 2020 | 20 |
| 72  | Rhodomollein XLIX                                                                     | <i>Rhododendron molle</i> , flowers            | 2020 | 20 |
| 73  | Rhodomollein L                                                                        | <i>Rhododendron molle</i> , flowers            | 2020 | 20 |
| 74  | Dauricanol A                                                                          | <i>Rhododendron dauricum</i> , flowers         | 2023 | 16 |
| 75  | Dauricanol B                                                                          | <i>Rhododendron dauricum</i> , flowers         | 2023 | 16 |
| 76  | Dauricanol C                                                                          | <i>Rhododendron dauricum</i> , flowers         | 2023 | 16 |
| 77  | Daublossomin G                                                                        | <i>Rhododendron dauricum</i> , flowers         | 2023 | 27 |
| 78  | Daublossomin H                                                                        | <i>Rhododendron dauricum</i> , flowers         | 2023 | 27 |
| 79  | Daublossomin I                                                                        | <i>Rhododendron dauricum</i> , flowers         | 2023 | 27 |
| 80  | Daublossomin J                                                                        | <i>Rhododendron dauricum</i> , flowers         | 2023 | 27 |
| 81  | Daublossomin K                                                                        | <i>Rhododendron dauricum</i> , flowers         | 2023 | 27 |
| 82  | Daublossomin L                                                                        | <i>Rhododendron dauricum</i> , flowers         | 2023 | 27 |
| 83  | Daublossomin M                                                                        | <i>Rhododendron dauricum</i> , flowers         | 2023 | 27 |
| 84  | Craibiodenoside A                                                                     | <i>Craibiodendron yunnanense</i> , leaves      | 2023 | 28 |
| 85  | Craibiodenoside B                                                                     | <i>Craibiodendron yunnanense</i> , leaves      | 2023 | 28 |
| 86  | Craibiodenoside C                                                                     | <i>Craibiodendron yunnanense</i> , leaves      | 2023 | 28 |
| 87  | Molleblossomin G                                                                      | <i>Rhododendron molle</i> , flowers            | 2024 | 29 |
| 88  | Molleblossomin H                                                                      | <i>Rhododendron molle</i> , flowers            | 2024 | 29 |
| 89  | Molleblossomin I                                                                      | <i>Rhododendron molle</i> , flowers            | 2024 | 29 |
| 90  | Molleblossomin J                                                                      | <i>Rhododendron molle</i> , flowers            | 2024 | 29 |
| 91  | Molleblossomin K                                                                      | <i>Rhododendron molle</i> , flowers            | 2024 | 29 |
| 92  | Molleblossomin L                                                                      | <i>Rhododendron molle</i> , flowers            | 2024 | 29 |
| 93  | 16-Acetylgrayanotoxin III                                                             | <i>Rhododendron micranthum</i> , roots         | 2020 | 19 |
| 94  | 3 $\beta$ , 6 $\beta$ , 16 $\alpha$ -trihydroxy-14b-acetoxy-grayan-1(5), 10(20)-diene | <i>Rhododendron micranthum</i> , roots         | 2020 | 19 |
| 95  | 14 $\beta$ -(2-Hydroxypropanoyloxy)rhodomollein XVII                                  | <i>Craibiodendron yunnanense</i> , leaves      | 2023 | 30 |
| 96  | 2-O-Ethoxyrhodojaponin VI                                                             | <i>Craibiodendron yunnanense</i> , leaves      | 2023 | 30 |
| 97  | Micranthanoside J                                                                     | <i>Craibiodendron yunnanense</i> , leaves      | 2023 | 30 |
| 98  | Mollfoliagein A                                                                       | <i>Rhododendron molle</i> , leaves             | 2018 | 7  |
| 99  | Mollfoliagein B                                                                       | <i>Rhododendron molle</i> , leaves             | 2018 | 7  |
| 100 | Mollfoliagein C                                                                       | <i>Rhododendron molle</i> , leaves             | 2018 | 7  |
| 101 | 6-O-Acetylrhodomollein XXXI                                                           | <i>Rhododendron molle</i> , leaves             | 2018 | 7  |
| 102 | Mollfoliagein E                                                                       | <i>Rhododendron molle</i> , leaves             | 2018 | 7  |
| 103 | Rhododecorumin VI                                                                     | <i>Rhododendron decorum</i> , leaves and twigs | 2018 | 22 |
| 104 | Rhododecorumin VII                                                                    | <i>Rhododendron decorum</i> , leaves and twigs | 2018 | 22 |
| 105 | Eoxypieristoxin A                                                                     | <i>Pieris formosa</i> , roots                  | 2019 | 31 |
| 106 | Eoxypieristoxin B                                                                     | <i>Pieris formosa</i> , roots                  | 2019 | 31 |
| 107 | Eoxypieristoxin C                                                                     | <i>Pieris formosa</i> , roots                  | 2019 | 31 |
| 108 | Eoxypieristoxin D                                                                     | <i>Pieris formosa</i> , roots                  | 2019 | 31 |

|     |                                                                            |                                                |      |    |
|-----|----------------------------------------------------------------------------|------------------------------------------------|------|----|
| 109 | Epoxyperistoxin E                                                          | <i>Pieris formosa</i> , roots                  | 2019 | 31 |
| 110 | Epoxyperistoxin F                                                          | <i>Pieris formosa</i> , roots                  | 2019 | 31 |
| 111 | Epoxyperistoxin G                                                          | <i>Pieris formosa</i> , roots                  | 2019 | 31 |
| 112 | Epoxyperistoxin H                                                          | <i>Pieris formosa</i> , roots                  | 2019 | 31 |
| 113 | 14-Deoxyrhodomollein XXXVII                                                | <i>Pieris japonica</i> , leaves                | 2019 | 26 |
| 114 | Rhodomollein XLVIII                                                        | <i>Rhododendron molle</i> , flowers            | 2020 | 20 |
| 115 | Micranthanol A                                                             | <i>Rhododendron micranthum</i> , leaves        | 2021 | 17 |
| 116 | Micranthanol B                                                             | <i>Rhododendron micranthum</i> , leaves        | 2021 | 17 |
| 117 | Daublossomin A                                                             | <i>Rhododendron dauricum</i> , flowers         | 2023 | 27 |
| 118 | Daublossomin B                                                             | <i>Rhododendron dauricum</i> , flowers         | 2023 | 27 |
| 119 | Daublossomin C                                                             | <i>Rhododendron dauricum</i> , flowers         | 2023 | 27 |
| 120 | Daublossomin D                                                             | <i>Rhododendron dauricum</i> , flowers         | 2023 | 27 |
| 121 | Daublossomin E                                                             | <i>Rhododendron dauricum</i> , flowers         | 2023 | 27 |
| 122 | Daublossomin F                                                             | <i>Rhododendron dauricum</i> , flowers         | 2023 | 27 |
| 123 | Craibiodenoside D                                                          | <i>Craibiodendron yunnanense</i> , leaves      | 2023 | 28 |
| 124 | Craibiodenoside E                                                          | <i>Craibiodendron yunnanense</i> , leaves      | 2023 | 28 |
| 125 | Craibiodenoside F                                                          | <i>Craibiodendron yunnanense</i> , leaves      | 2023 | 28 |
| 126 | Molleblossomin A                                                           | <i>Rhododendron molle</i> , flowers            | 2024 | 29 |
| 127 | Molleblossomin B                                                           | <i>Rhododendron molle</i> , flowers            | 2024 | 29 |
| 128 | Molleblossomin C                                                           | <i>Rhododendron molle</i> , flowers            | 2024 | 29 |
| 129 | Molleblossomin D                                                           | <i>Rhododendron molle</i> , flowers            | 2024 | 29 |
| 130 | Molleblossomin E                                                           | <i>Rhododendron molle</i> , flowers            | 2024 | 29 |
| 131 | Molleblossomin F                                                           | <i>Rhododendron molle</i> , flowers            | 2024 | 29 |
| 132 | Auriculatol A                                                              | <i>Rhododendron auriculatum</i> , leaves       | 2019 | 25 |
| 133 | 9 $\beta$ -Hydroxy-1,5-seco-grayanotoxin                                   | <i>Rhododendron micranthum</i> , leaves        | 2021 | 17 |
| 134 | Dauricanol D                                                               | <i>Rhododendron dauricum</i> , flowers         | 2023 | 16 |
| 135 | Dauricanol E                                                               | <i>Rhododendron dauricum</i> , flowers         | 2023 | 16 |
| 136 | Pierisjaponin A                                                            | <i>Pieris japonica</i> , leaves                | 2020 | 18 |
| 137 | Pierisjaponin B                                                            | <i>Pieris japonica</i> , leaves                | 2020 | 18 |
| 138 | Rhodoauriculatol A                                                         | <i>Rhododendron auriculatum</i> , leaves       | 2019 | 21 |
| 139 | Rhodoauriculatol B                                                         | <i>Rhododendron auriculatum</i> , leaves       | 2019 | 21 |
| 140 | Rhodoauriculatol C                                                         | <i>Rhododendron auriculatum</i> , leaves       | 2019 | 21 |
| 141 | Rhodoauriculatol D                                                         | <i>Rhododendron auriculatum</i> , leaves       | 2019 | 21 |
| 142 | Pierisjaponin J                                                            | <i>Pieris japonica</i> , leaves                | 2020 | 18 |
| 143 | Birhodomollein D                                                           | <i>Rhododendron pumilum</i> , fruits           | 2018 | 32 |
| 144 | Birhodomollein E                                                           | <i>Rhododendron pumilum</i> , fruits           | 2018 | 32 |
| 145 | Bimollfoliagin A                                                           | <i>Rhododendron molle</i> , leaves             | 2018 | 7  |
| 146 | Rhodomollein XLIII                                                         | <i>Rhododendron molle</i> , flowers            | 2020 | 20 |
| 147 | Bismollether A                                                             | <i>Rhododendron molle</i> , flowers            | 2022 | 24 |
| 148 | Bismollether B                                                             | <i>Rhododendron molle</i> , flowers            | 2022 | 24 |
| 149 | Bismollether C                                                             | <i>Rhododendron molle</i> , flowers            | 2022 | 24 |
| 150 | Rhododecorumin I                                                           | <i>Rhododendron decorum</i> , leaves and twigs | 2018 | 22 |
| 151 | Rhododecorumin II                                                          | <i>Rhododendron decorum</i> , leaves and twigs | 2018 | 22 |
| 152 | Rhododecorumin III                                                         | <i>Rhododendron decorum</i> , leaves and twigs | 2018 | 22 |
| 153 | Rhodoauriculatol G                                                         | <i>Rhododendron auriculatum</i> , leaves       | 2019 | 21 |
| 154 | Rhodoauriculatol H                                                         | <i>Rhododendron auriculatum</i> , leaves       | 2019 | 21 |
| 155 | Rhodomicranoside A                                                         | <i>Rhododendron auriculatum</i> , leaves       | 2019 | 14 |
| 156 | Rhodomicranoside B                                                         | <i>Rhododendron auriculatum</i> , leaves       | 2019 | 14 |
| 157 | Rhodomicranoside C                                                         | <i>Rhododendron auriculatum</i> , leaves       | 2019 | 14 |
| 158 | Rhodomollein LII                                                           | <i>Rhododendron molle</i> , flowers            | 2020 | 20 |
| 159 | Rhodomollein LIII                                                          | <i>Rhododendron molle</i> , flowers            | 2020 | 20 |
| 160 | 3 $\beta$ ,7 $\alpha$ ,14 $\beta$ -trihydroxy-leucoth-10(20),15-dien-5-one | <i>Pieris formosa</i> , roots                  | 2020 | 15 |
| 161 | 10 $\alpha$ ,16 $\alpha$ -dihydroxy-leucoth-5-one                          | <i>Pieris formosa</i> , roots                  | 2020 | 15 |
| 162 | Pierisjaponin F                                                            | <i>Pieris japonica</i> , leaves                | 2020 | 18 |
| 163 | Pierisjaponin G                                                            | <i>Pieris japonica</i> , leaves                | 2020 | 28 |
| 164 | Rhodoauriculatol F                                                         | <i>Rhododendron auriculatum</i> , leaves       | 2019 | 21 |

|     |                                          |                                                |      |    |
|-----|------------------------------------------|------------------------------------------------|------|----|
| 165 | Pierisentkauran B                        | <i>Pieris formosa</i> , roots                  | 2020 | 15 |
| 166 | Pierisentkauran C                        | <i>Pieris formosa</i> , roots                  | 2020 | 15 |
| 167 | Pierisentkauran D                        | <i>Pieris formosa</i> , roots                  | 2020 | 15 |
| 168 | Pierisentkauran E                        | <i>Pieris formosa</i> , roots                  | 2020 | 15 |
| 169 | Rhodomicranoside D                       | <i>Rhododendron micranthum</i> , leaves        | 2019 | 14 |
| 170 | Rhodomicranoside E                       | <i>Rhododendron micranthum</i> , leaves        | 2019 | 14 |
| 171 | Pierisentkauran F                        | <i>Pieris formosa</i> , roots                  | 2020 | 15 |
| 172 | Pierisjaponin H                          | <i>Pieris japonica</i> , leaves                | 2020 | 18 |
| 173 | Pierisjaponin I                          | <i>Pieris japonica</i> , leaves                | 2020 | 18 |
| 174 | 8 $\alpha$ -O-Acetyl rhodomollein XXIII  | <i>Rhododendron micranthum</i> , leaves        | 2021 | 17 |
| 175 | Rhodokalmanol A                          | <i>Rhododendron dauricum</i> , leaves          | 2022 | 33 |
| 176 | Rhodokalmanol B                          | <i>Rhododendron dauricum</i> , leaves          | 2022 | 33 |
| 177 | Rhodokalmanol C                          | <i>Rhododendron dauricum</i> , leaves          | 2022 | 33 |
| 178 | Rhodokalmanol D                          | <i>Rhododendron dauricum</i> , leaves          | 2022 | 33 |
| 179 | 16 $\alpha$ -acetox y rhodomollein XXIII | <i>Rhododendron micranthum</i> , roots         | 2020 | 19 |
| 180 | Rhodomollein LI                          | <i>Rhododendron molle</i> , flowers            | 2020 | 20 |
| 181 | Rhodoauriculatol E                       | <i>Rhododendron auriculatum</i> , leaves       | 2019 | 21 |
| 182 | Mollebenzylanol A                        | <i>Rhododendron molle</i> , leaves             | 2018 | 23 |
| 183 | Mollebenzylanol B                        | <i>Rhododendron molle</i> , leaves             | 2018 | 23 |
| 184 | Rhododecorumin IV                        | <i>Rhododendron decorum</i> , leaves and twigs | 2018 | 22 |
| 185 | Rhododecorumin V                         | <i>Rhododendron decorum</i> , leaves and twigs | 2018 | 22 |
| 186 | Micranthanone B                          | <i>Rhododendron micranthum</i> , leaves        | 2021 | 17 |
| 187 | Micranthanone C                          | <i>Rhododendron micranthum</i> , leaves        | 2021 | 17 |
| 188 | 14-epi-Mollanol A                        | <i>Rhododendron micranthum</i> , leaves        | 2021 | 17 |
| 189 | Mollanol B                               | <i>Rhododendron micranthum</i> , leaves        | 2021 | 17 |
| 190 | Mollanol C                               | <i>Rhododendron micranthum</i> , leaves        | 2021 | 17 |
| 191 | Pierisjaponin E                          | <i>Pieris japonica</i> , leaves                | 2020 | 18 |
| 192 | Rhomollone A                             | <i>Rhododendron molle</i> , flowers            | 2020 | 20 |
| 193 | rhodauricanol A                          | <i>Rhododendron dauricum</i> , flowers         | 2023 | 16 |

Table S2. Compound names and reported activities.

| no | name              | Test model/ in vivo                                      | Activity/ dose                                 | Test model/in vitro             | Activity/ dose                                 |
|----|-------------------|----------------------------------------------------------|------------------------------------------------|---------------------------------|------------------------------------------------|
| 1  | Pierisformosoid A | Acetic acid-Induced pain mouse model Plutella xylostella | Analgesic, 5 mg/kg<br>Antifeedant, 0.5 mg/mL   | Nav1.7 channel<br>KCNQ2 channel | ND, 10 $\mu$ M<br>ND, 10 $\mu$ M               |
| 2  | Pierisformosoid B | Acetic acid-Induced pain mouse model                     | Analgesic, 1 mg/kg                             | Nav1.7 channel<br>KCNQ2 channel | ND, 10 $\mu$ M<br>ND, 10 $\mu$ M               |
| 3  | Pierisformosoid C | -                                                        | -                                              | Nav1.7 channel<br>KCNQ2 channel | ND, 10 $\mu$ M<br>ND, 10 $\mu$ M               |
| 4  | Pierisformosoid D | Acetic acid-induced pain mouse model Plutella xylostella | Analgesic, 0.1 mg/kg<br>Antifeedant, 0.5 mg/mL | Nav1.7 channel<br>KCNQ2 channel | ND, 10 $\mu$ M<br>38.3% inhibitory, 10 $\mu$ M |
| 5  | Pierisformosoid E | Acetic acid-Induced pain mouse model                     | Analgesic, 5 mg/kg                             | Nav1.7 channel<br>KCNQ2 channel | ND, 10 $\mu$ M<br>ND, 10 $\mu$ M               |
| 6  | Pierisformosoid F | -                                                        | -                                              | Nav1.7 channel<br>KCNQ2 channel | ND, 10 $\mu$ M<br>ND, 10 $\mu$ M               |

|    |                                     |                                                          |                              |                                            |                                                    |
|----|-------------------------------------|----------------------------------------------------------|------------------------------|--------------------------------------------|----------------------------------------------------|
| 7  | Pierisformosoid G                   | Acetic acid-Induced pain mouse model                     | Analgesic, 0.1 mg/kg         | Nav1.7 channel<br>KCNQ2 channel            | ND, 10 $\mu$ M<br>ND, 10 $\mu$ M                   |
| 8  | Pierisformosoid H                   | Acetic acid-Induced pain mouse model                     | Analgesic, 5 mg/kg           | Nav1.7 channel<br>KCNQ2 channel            | ND, 10 $\mu$ M<br>ND, 10 $\mu$ M                   |
| 9  | Pierisformosoid I                   | Acetic acid-Induced pain mouse model Plutella xylostella | ND<br>Antifeedant, 0.5 mg/mL | Nav1.7 channel<br>KCNQ2 channel            | ND, 10 $\mu$ M<br>ND, 10 $\mu$ M                   |
| 10 | Pierisformosoid J                   | Acetic acid-Induced pain mouse model                     | ND                           | Nav1.7 channel<br>KCNQ2 channel            | ND, 10 $\mu$ M<br>ND, 10 $\mu$ M                   |
| 11 | Pierisformosoid K                   | Acetic acid-Induced pain mouse model                     | ND                           | Nav1.7 channel<br>KCNQ2 channel            | ND, 10 $\mu$ M<br>ND, 10 $\mu$ M                   |
| 12 | Pierisformosoid L                   | Acetic acid-Induced pain mouse model                     | ND                           | Nav1.7 channel<br>KCNQ2 channel            | ND, 10 $\mu$ M<br>ND, 10 $\mu$ M                   |
| 13 | 3-epi-grayanoside B                 | Acetic acid-Induced pain mouse model                     | Analgesic, 5.0 mg/kg         | Anti-inflammatory<br>Cytotoxicity<br>PTP1B | ND, 40 $\mu$ M<br>ND, 40 $\mu$ M<br>ND, 40 $\mu$ M |
| 14 | Micranthanoside A                   | Acetic acid-Induced pain mouse model                     | Analgesic, 0.2 mg/kg         | Anti-inflammatory<br>Cytotoxicity<br>PTP1B | ND, 40 $\mu$ M<br>ND, 40 $\mu$ M<br>ND, 40 $\mu$ M |
| 15 | Micranthanoside B                   | Acetic acid-Induced pain mouse model                     | Analgesic, 1.0 mg/kg         | Anti-inflammatory<br>Cytotoxicity<br>PTP1B | ND, 40 $\mu$ M<br>ND, 40 $\mu$ M<br>ND, 40 $\mu$ M |
| 16 | Micranthanoside C                   | Acetic acid-Induced pain mouse model                     | Analgesic, 5.0 mg/kg         | Anti-inflammatory<br>Cytotoxicity<br>PTP1B | ND, 40 $\mu$ M<br>ND, 40 $\mu$ M<br>ND, 40 $\mu$ M |
| 17 | Micranthanoside D                   | Acetic acid-Induced pain mouse model                     | Analgesic, 5.0 mg/kg         | Anti-inflammatory<br>Cytotoxicity<br>PTP1B | ND, 40 $\mu$ M<br>ND, 40 $\mu$ M<br>ND, 40 $\mu$ M |
| 18 | Micranthanoside E                   | Acetic acid-Induced pain mouse model                     | Analgesic, 5.0 mg/kg         | Anti-inflammatory<br>Cytotoxicity<br>PTP1B | ND, 40 $\mu$ M<br>ND, 40 $\mu$ M<br>ND, 40 $\mu$ M |
| 19 | hydroxygrayanoside C                | Acetic acid-Induced pain mouse model                     | Analgesic, 1.0 mg/kg         | Anti-inflammatory<br>Cytotoxicity<br>PTP1B | ND, 40 $\mu$ M<br>ND, 40 $\mu$ M<br>ND, 40 $\mu$ M |
| 20 | micranthanoside F                   | Acetic acid-Induced pain mouse model                     | Analgesic, 5.0 mg/kg         | Anti-inflammatory<br>Cytotoxicity<br>PTP1B | ND, 40 $\mu$ M<br>ND, 40 $\mu$ M<br>ND, 40 $\mu$ M |
| 21 | 14 $\beta$ -acetyoxymicranthanoside | Acetic acid-Induced pain mouse model                     | Analgesic, 5.0 mg/kg         | Anti-inflammatory<br>Cytotoxicity<br>PTP1B | ND, 40 $\mu$ M<br>ND, 40 $\mu$ M<br>ND, 40 $\mu$ M |
| 22 | micranthanoside G                   | Acetic acid-Induced pain mouse model                     | Analgesic, 5.0 mg/kg         | Anti-inflammatory<br>Cytotoxicity<br>PTP1B | ND, 40 $\mu$ M<br>ND, 40 $\mu$ M<br>ND, 40 $\mu$ M |
| 23 | 14-Oacetylmicranthanoside G         | Acetic acid-Induced pain mouse model                     | Analgesic, 5.0 mg/kg         | Anti-inflammatory<br>Cytotoxicity<br>PTP1B | ND, 40 $\mu$ M<br>ND, 40 $\mu$ M<br>ND, 40 $\mu$ M |
| 24 | 14 $\beta$ -hydroxypieroside A      | Acetic acid-Induced pain mouse model                     | Analgesic, 5.0 mg/kg         | Anti-inflammatory<br>Cytotoxicity<br>PTP1B | ND, 40 $\mu$ M<br>ND, 40 $\mu$ M<br>ND, 40 $\mu$ M |
| 25 | micranthanoside H                   | Acetic acid-Induced pain mouse model                     | Analgesic, 5.0 mg/kg         | Anti-inflammatory<br>Cytotoxicity<br>PTP1B | ND, 40 $\mu$ M<br>ND, 40 $\mu$ M<br>ND, 40 $\mu$ M |

|    |                                  |                                      |                       |                   |                |
|----|----------------------------------|--------------------------------------|-----------------------|-------------------|----------------|
| 26 | Mollfoliagein D                  | -                                    |                       | Anti-inflammatory | ND, 40 $\mu$ M |
| 27 | 6-O-Acetyl rhodomollein XI       | -                                    |                       | Anti-inflammatory | ND, 40 $\mu$ M |
| 28 | Mollfoliagein F                  | --                                   |                       | Anti-inflammatory | ND, 40 $\mu$ M |
| 29 | 18-Hydroxygrayanotoxin XVIII     |                                      |                       | Anti-inflammatory | ND, 40 $\mu$ M |
| 30 | 2-O-Methyl rhodomolin I          | -                                    |                       | Anti-inflammatory | ND, 40 $\mu$ M |
| 31 | 2-O-Methyl rhodomollein XII      | -                                    |                       | Anti-inflammatory | ND, 40 $\mu$ M |
| 32 | 2-O-Methyl rhodojaponin VI       | -                                    |                       | Anti-inflammatory | ND, 40 $\mu$ M |
| 33 | 2-O-Methyl rhodojaponin VII      | -                                    |                       | Anti-inflammatory | ND, 40 $\mu$ M |
| 34 | Rhododecorumin VIII              | Acetic acid-Induced pain mouse model | Analgesic, 10.0 mg/kg | -                 |                |
| 35 | Rhododecorumin IX                | -                                    |                       | -                 |                |
| 36 | Rhododecorumin X                 | Acetic acid-Induced pain mouse model | Analgesic, 10.0 mg/kg | -                 |                |
| 37 | Rhododecorumin XI                | Acetic acid-Induced pain mouse model | Analgesic, 10.0 mg/kg | -                 |                |
| 38 | Rhododecorumin XII               | Acetic acid-induced pain mouse model | Analgesic, 0.8 mg/kg  | -                 |                |
| 39 | Rhododeoside I                   | Acetic acid-Induced pain mouse model | Analgesic, 10.0 mg/kg | -                 |                |
| 40 | Rhodoauriculatol I               | Acetic acid-Induced pain mouse model | Analgesic, 1.0 mg/kg  | -                 |                |
| 41 | Rhodomicrosides F                | Acetic acid-Induced pain mouse model | Analgesic, 5.0 mg/kg  | -                 |                |
| 42 | Rhodomicrosides G                | Acetic acid-Induced pain mouse model | Analgesic, 5.0 mg/kg  | -                 |                |
| 43 | Rhodomicrosides H                | Acetic acid-Induced pain mouse model | Analgesic, 1.0 mg/kg  | -                 |                |
| 44 | Rhodomicrosides I                | Acetic acid-Induced pain mouse model | Analgesic, 1.0 mg/kg  | -                 |                |
| 45 | Auriculatol B                    | Acetic acid-Induced pain mouse model | Analgesic, 5.0 mg/kg  | -                 |                |
| 46 | 3-epi-Grayanotoxin XVIII         | Acetic acid-Induced pain mouse model | Analgesic, 5.0 mg/kg  | -                 |                |
| 47 | 6-Deoxycraibiotoxin I            | Acetic acid-Induced pain mouse model | Analgesic, 5.0 mg/kg  | -                 |                |
| 48 | 3-epi-Auriculatol B              | Acetic acid-Induced pain mouse model | Analgesic, 5.0 mg/kg  | -                 |                |
| 49 | 19-Hydroxy-3-epi-auriculatol B   | Acetic acid-Induced pain mouse model | Analgesic, 5.0 mg/kg  | -                 |                |
| 50 | Auriculatol C                    | Acetic acid-Induced pain mouse model | Analgesic, 5.0 mg/kg  | -                 |                |
| 51 | Auriculatol D                    | Acetic acid-Induced pain mouse model | Analgesic, 5.0 mg/kg  | -                 |                |
| 52 | Auriculatol E                    | Acetic acid-Induced pain mouse model | Analgesic, 1.0 mg/kg  | -                 |                |
| 53 | Auriculatol F                    | Acetic acid-Induced pain mouse model | Analgesic, 5.0 mg/kg  | -                 |                |
| 54 | 2 $\alpha$ -Hydroxyauriculatol F | Acetic acid-Induced pain mouse model | Analgesic, 5.0 mg/kg  | -                 |                |
| 55 | 1-epi-Pieristoxin S              | Acetic acid-Induced pain mouse model | Analgesic, 5.0 mg/kg  | -                 |                |
| 56 | 17-Hydroxygrayanotoxin XIX       | Acetic acid-Induced pain mouse model | Analgesic, 0.04 mg/kg | -                 |                |
| 57 | 2-O-Methyl rhodomollein XIX      | Acetic acid-Induced pain mouse model | Analgesic, 5.0 mg/kg  | -                 |                |

|    |                                       |                                      |                       |                   |                   |
|----|---------------------------------------|--------------------------------------|-----------------------|-------------------|-------------------|
| 58 | 17-Hydroxy-3-epi-auriculatol B        | Acetic acid-Induced pain mouse model | Analgesic, 5.0 mg/kg  | -                 |                   |
| 59 | Pierisjaponol A                       | Acetic acid-Induced pain mouse model | Analgesic, 0.2 mg/kg  | -                 |                   |
| 60 | Pierisjaponol B                       | Acetic acid-Induced pain mouse model | Analgesic, 5.0 mg/kg  | -                 |                   |
| 61 | 13 $\alpha$ -Hydroxyrhodomollein XVII | Acetic acid-Induced pain mouse model | Analgesic, 5.0 mg/kg  | -                 |                   |
| 62 | 12 $\beta$ -Hydroxygrayanotoxin XVIII | Acetic acid-Induced pain mouse model | Analgesic, 5.0 mg/kg  | -                 |                   |
| 63 | 2 $\alpha$ -Hydroxyasebotoxin II      | Acetic acid-Induced pain mouse model | Analgesic, 5.0 mg/kg  | -                 |                   |
| 64 | 2 $\alpha$ -O-Methylgrayanotoxin II   | Acetic acid-Induced pain mouse model | Analgesic, 5.0 mg/kg  | -                 |                   |
| 65 | Pierisjaponol C                       | Acetic acid-Induced pain mouse model | Analgesic, 5.0 mg/kg  | -                 |                   |
| 66 | 16-O-Methylgrayanotoxin XVIII         | Acetic acid-Induced pain mouse model | Analgesic, 5.0 mg/kg  | -                 |                   |
| 67 | Pierisjaponol D                       | Acetic acid-Induced pain mouse model | Analgesic, 5.0 mg/kg  | -                 |                   |
| 68 | Rhodomollein XLIV                     | Acetic acid-Induced pain mouse model | Analgesic, 20.0 mg/kg | -                 |                   |
| 69 | Rhodomollein XLV                      | Acetic acid-Induced pain mouse model | Analgesic, 20.0 mg/kg | -                 |                   |
| 70 | Rhodomollein XLVI                     | -                                    |                       | -                 |                   |
| 71 | Rhodomollein XLVII                    | Acetic acid-Induced pain mouse model | Analgesic, 2.0 mg/kg  | -                 |                   |
| 72 | Rhodomollein XLIX                     | -                                    |                       | -                 |                   |
| 73 | Rhodomollein L                        | -                                    |                       | -                 |                   |
| 74 | Dauricanol A                          | Acetic acid-Induced pain mouse model | Analgesic, 5.0 mg/kg  |                   |                   |
| 75 | Dauricanol B                          | Acetic acid-Induced pain mouse model | Analgesic, 0.04 mg/kg |                   |                   |
| 76 | Dauricanol C                          | Acetic acid-Induced pain mouse model | Analgesic, 0.04 mg/kg |                   |                   |
| 77 | Daublossomin G                        | Acetic acid-Induced pain mouse model | Analgesic, 5.0 mg/kg  |                   |                   |
| 78 | Daublossomin H                        | Acetic acid-Induced pain mouse model | Analgesic, 5.0 mg/kg  |                   |                   |
| 79 | Daublossomin I                        | Acetic acid-Induced pain mouse model | ND                    |                   |                   |
| 80 | Daublossomin J                        | Acetic acid-Induced pain mouse model | Analgesic, 5.0 mg/kg  |                   |                   |
| 81 | Daublossomin K                        | Acetic acid-Induced pain mouse model | Analgesic, 5.0 mg/kg  |                   |                   |
| 82 | Daublossomin L                        | -                                    |                       |                   |                   |
| 83 | Daublossomin M                        | Acetic acid-Induced pain mouse model | Analgesic, 5.0 mg/kg  |                   |                   |
| 84 | Craibiodenoside A                     |                                      |                       | Anti-inflammatory | ND, 10 $\mu$ g/mL |
| 85 | Craibiodenoside B                     |                                      |                       | Anti-inflammatory | 10 $\mu$ g/mL     |
| 86 | Craibiodenoside C                     |                                      |                       | Anti-inflammatory | 10 $\mu$ g/mL     |
| 87 | Molleblossomin G                      | Acetic acid-Induced pain mouse model | Analgesic, 5.0 mg/kg  | -                 |                   |
| 88 | Molleblossomin H                      | Acetic acid-Induced pain mouse model | Analgesic, 5.0 mg/kg  | -                 |                   |
| 89 | Molleblossomin I                      | Acetic acid-Induced pain mouse model | Analgesic, 5.0 mg/kg  | -                 |                   |
| 90 | Molleblossomin J                      | Acetic acid-Induced pain mouse model | Analgesic, 5.0 mg/kg  | -                 |                   |
| 91 | Molleblossomin K                      | Acetic acid-Induced pain mouse model | Analgesic, 5.0 mg/kg  | -                 |                   |

|     |                                                                                       |                                      |                       |                   |                                         |
|-----|---------------------------------------------------------------------------------------|--------------------------------------|-----------------------|-------------------|-----------------------------------------|
| 92  | Molleblossomin L                                                                      | Acetic acid-Induced pain mouse model | Analgesic, 5.0 mg/kg  | -                 |                                         |
| 93  | 16-Acetylgrayanotoxin III                                                             | Acetic acid-Induced pain mouse model | Analgesic, 1.0 mg/kg  | -                 |                                         |
| 94  | 3 $\beta$ , 6 $\beta$ , 16 $\alpha$ -trihydroxy-14b-acetoxy-grayan-1(5), 10(20)-diene | Acetic acid-Induced pain mouse model | Analgesic, 0.8 mg/kg  | -                 |                                         |
| 95  | 14 $\beta$ -(2-Hydroxypropanoyloxy)rhodomollein XVII                                  | -                                    |                       | -                 |                                         |
| 96  | 2-O-Ethoxyrhodojaponin VI                                                             | -                                    |                       | -                 |                                         |
| 97  | Micranthanoside J                                                                     | -                                    |                       | -                 |                                         |
| 98  | Mollfoliagein A                                                                       | -                                    |                       | Anti-inflammatory | ND, 40 $\mu$ M                          |
| 99  | Mollfoliagein B                                                                       | -                                    |                       | Anti-inflammatory | ND, 40 $\mu$ M                          |
| 100 | Mollfoliagein C                                                                       | -                                    |                       | Anti-inflammatory | IC <sub>50</sub> 35.4 $\pm$ 3.9 $\mu$ M |
| 101 | 6-O-Acetylrhodomollein XXXI                                                           | -                                    |                       | Anti-inflammatory | ND, 40 $\mu$ M                          |
| 102 | Mollfoliagein E                                                                       | -                                    |                       | Anti-inflammatory | ND, 40 $\mu$ M                          |
| 103 | Rhododecorumin VI                                                                     | Acetic acid-Induced pain mouse model | Analgesic, 10.0 mg/kg | -                 |                                         |
| 104 | Rhododecorumin VII                                                                    | -                                    |                       | -                 |                                         |
| 105 | Epoxyperistoxin A                                                                     | Acetic acid-Induced pain mouse model | Analgesic, 5.0 mg/kg  | -                 |                                         |
| 106 | Epoxyperistoxin B                                                                     | Acetic acid-Induced pain mouse model | Analgesic, 5.0 mg/kg  | -                 |                                         |
| 107 | Epoxyperistoxin C                                                                     | Acetic acid-Induced pain mouse model | Analgesic, 5.0 mg/kg  | -                 |                                         |
| 108 | Epoxyperistoxin D                                                                     | -                                    |                       | -                 |                                         |
| 109 | Epoxyperistoxin E                                                                     | Acetic acid-Induced pain mouse model | Analgesic, 5.0 mg/kg  | -                 |                                         |
| 110 | Epoxyperistoxin F                                                                     | Acetic acid-Induced pain mouse model | Analgesic, 5.0 mg/kg  | -                 |                                         |
| 111 | Epoxyperistoxin G                                                                     | Acetic acid-Induced pain mouse model | Analgesic, 5.0 mg/kg  | -                 |                                         |
| 112 | Epoxyperistoxin H                                                                     | Acetic acid-Induced pain mouse model | Analgesic, 5.0 mg/kg  | -                 |                                         |
| 113 | 14-Deoxyrhodomollein XXXVII                                                           | Acetic acid-Induced pain mouse model | Analgesic, 5.0 mg/kg  | -                 |                                         |
| 114 | Rhodomollein XLVIII                                                                   | Acetic acid-Induced pain mouse model | Analgesic, 20.0 mg/kg | -                 |                                         |
| 115 | Micranthanol A                                                                        | Acetic acid-Induced pain mouse model | Analgesic, 5.0 mg/kg  | -                 |                                         |
| 116 | Micranthanol B                                                                        | Acetic acid-Induced pain mouse model | Analgesic, 5.0 mg/kg  | -                 |                                         |
| 117 | Daublossomin A                                                                        | Acetic acid-Induced pain mouse model | Analgesic, 0.2 mg/kg  | -                 |                                         |
| 118 | Daublossomin B                                                                        | Acetic acid-Induced pain mouse model | Analgesic, 5.0 mg/kg  | -                 |                                         |
| 119 | Daublossomin C                                                                        | Acetic acid-Induced pain mouse model | Analgesic, 5.0 mg/kg  | -                 |                                         |
| 120 | Daublossomin D                                                                        | Acetic acid-Induced pain mouse model | Analgesic, 5.0 mg/kg  | -                 |                                         |
| 121 | Daublossomin E                                                                        | Acetic acid-Induced pain mouse model | Analgesic, 5.0 mg/kg  | -                 |                                         |
| 122 | Daublossomin F                                                                        | Acetic acid-Induced pain mouse model | Analgesic, 0.2 mg/kg  | -                 |                                         |
| 123 | Craibiodenoside D                                                                     | -                                    |                       | Anti-inflammatory | ND, 10 $\mu$ g/mL                       |
| 124 | Craibiodenoside E                                                                     | -                                    |                       | Anti-inflammatory | ND, 10 $\mu$ g/mL                       |



|     |                                  |                                                                                                             |                                                                      |                   |           |
|-----|----------------------------------|-------------------------------------------------------------------------------------------------------------|----------------------------------------------------------------------|-------------------|-----------|
| 125 | Craibiodenoside F                | -                                                                                                           |                                                                      | Anti-inflammatory | 10 µg/mL  |
| 126 | Molleblossomin A                 | Acetic acid-Induced pain mouse model                                                                        | Analgesic, 5.0 mg/kg                                                 | -                 |           |
| 127 | Molleblossomin B                 | Acetic acid-Induced pain mouse model                                                                        | Analgesic, 5.0 mg/kg                                                 | -                 |           |
| 128 | Molleblossomin C                 | Acetic acid-Induced pain mouse model                                                                        | Analgesic, 5.0 mg/kg                                                 | -                 |           |
| 129 | Molleblossomin D                 | Acetic acid-Induced pain mouse model                                                                        | Analgesic, 5.0 mg/kg                                                 | -                 |           |
| 130 | Molleblossomin E                 | Acetic acid-Induced pain mouse model                                                                        | Analgesic, 5.0 mg/kg                                                 | -                 |           |
| 131 | Molleblossomin F                 | Acetic acid-Induced pain mouse model                                                                        | Analgesic, 0.2 mg/kg                                                 | -                 |           |
| 132 | Auriculatol A                    | Acetic acid-Induced pain mouse model                                                                        | Analgesic, 5.0 mg/kg                                                 | -                 |           |
| 133 | 9β-Hydroxy-1,5-seco-grayanotoxin | Acetic acid-Induced pain mouse model                                                                        | Analgesic, 5.0 mg/kg                                                 | -                 |           |
| 134 | Dauricanol D                     | Acetic acid-Induced pain mouse model                                                                        | Analgesic, 1.0 mg/kg                                                 | -                 |           |
| 135 | Dauricanol E                     | Acetic acid-Induced pain mouse model                                                                        | Analgesic, 1.0 mg/kg                                                 | -                 |           |
| 136 | Pierisjaponin A                  | Acetic acid-Induced pain mouse model                                                                        | Analgesic, 1.0 mg/kg                                                 | -                 |           |
| 137 | Pierisjaponin B                  | Acetic acid-Induced pain mouse model                                                                        | Analgesic, 0.04 mg/kg                                                | -                 |           |
| 138 | Rhodoauriculatol A               | Acetic acid-Induced pain mouse model                                                                        | Analgesic, 5.0 mg/kg                                                 | -                 |           |
| 139 | Rhodoauriculatol B               | Acetic acid-Induced pain mouse model                                                                        | Analgesic, 5.0 mg/kg                                                 | -                 |           |
| 140 | Rhodoauriculatol C               | Acetic acid-Induced pain mouse model                                                                        | Analgesic, 5.0 mg/kg                                                 | -                 |           |
| 141 | Rhodoauriculatol D               | Acetic acid-Induced pain mouse model                                                                        | Analgesic, 5.0 mg/kg                                                 | -                 |           |
| 142 | Pierisjaponin J                  | Acetic acid-Induced pain mouse model                                                                        | Analgesic, 5.0 mg/kg                                                 | -                 |           |
| 143 | Birhodomollein D                 | -                                                                                                           |                                                                      | -                 |           |
| 144 | Birhodomollein E                 | -                                                                                                           |                                                                      | -                 |           |
| 145 | Bimollfoliagein A                | -                                                                                                           |                                                                      | Anti-inflammatory | ND, 40 µM |
| 146 | Rhodomollein XLIII               | -                                                                                                           |                                                                      | -                 |           |
| 147 | Bismollether A                   | Acetic acid-Induced pain mouse model                                                                        | Analgesic, 5.0 mg/kg                                                 | -                 |           |
| 148 | Bismollether B                   | Acetic acid-Induced pain mouse model<br>Capsaicin-Induced pain mouse model<br>AITC-Induced pain mouse model | Analgesic, 0.2 mg/kg<br>Analgesic, 5.0 mg/kg<br>Analgesic, 5.0 mg/kg |                   |           |
| 149 | Bismollether C                   | Acetic acid-Induced pain mouse model                                                                        | Analgesic, 5.0 mg/kg                                                 |                   |           |
| 150 | Rhododecorumin I                 | Acetic acid-Induced pain mouse model                                                                        | Analgesic, 10.0 mg/kg                                                | -                 |           |
| 151 | Rhododecorumin II                | -                                                                                                           |                                                                      | -                 |           |
| 152 | Rhododecorumin III               | Acetic acid-Induced pain mouse model                                                                        | Analgesic, 10.0 mg/kg                                                | -                 |           |
| 153 | Rhodoauriculatol G               | Acetic acid-Induced pain mouse model                                                                        | Analgesic, 5.0 mg/kg                                                 | -                 |           |
| 154 | Rhodoauriculatol H               | Acetic acid-Induced pain mouse model                                                                        | Analgesic, 5.0 mg/kg                                                 | -                 |           |
| 155 | Rhodomicronoside A               | Acetic acid-Induced pain mouse model                                                                        | Analgesic, 1.0 mg/kg                                                 | -                 |           |
| 156 | Rhodomicronoside B               | Acetic acid-Induced pain mouse model                                                                        | Analgesic, 1.0 mg/kg                                                 | -                 |           |

|     |                                                                            |                                      |                                              |       |                                           |
|-----|----------------------------------------------------------------------------|--------------------------------------|----------------------------------------------|-------|-------------------------------------------|
| 157 | Rhodomicroside C                                                           | Acetic acid-Induced pain mouse model | Analgesic, 1.0 mg/kg                         | -     |                                           |
| 158 | Rhodomollein LII                                                           | -                                    |                                              | -     |                                           |
| 159 | Rhodomollein LIII                                                          | Acetic acid-Induced pain mouse model | Analgesic, 5.0 mg/kg                         | -     |                                           |
| 160 | 3 $\beta$ ,7 $\alpha$ ,14 $\beta$ -trihydroxy-leucoth-10(20),15-dien-5-one | Acetic acid-Induced pain mouse model | Analgesic, 5.0 mg/kg                         | -     |                                           |
| 161 | 10 $\alpha$ ,16 $\alpha$ -dihydroxy-leucoth-5-one                          | Acetic acid-Induced pain mouse model | Analgesic, 5 mg/kg<br>Antifeedant, 0.5 mg/mL | -     |                                           |
| 162 | Pierisjaponin F                                                            | Acetic acid-Induced pain mouse model | Analgesic, 1.0 mg/kg                         | -     |                                           |
| 163 | Pierisjaponin G                                                            | Acetic acid-Induced pain mouse model | Analgesic, 5.0 mg/kg                         | -     |                                           |
| 164 | Rhodoauriculatol F                                                         | Acetic acid-Induced pain mouse model | Analgesic, 5.0 mg/kg                         | -     |                                           |
| 165 | Pierisentkauran B                                                          | -                                    |                                              | -     |                                           |
| 166 | Pierisentkauran C                                                          | Acetic acid-Induced pain mouse model | Analgesic, 5.0 mg/kg                         | -     |                                           |
| 167 | Pierisentkauran D                                                          | Plutella xylostella                  | Antifeedant, 0.5 mg/mL                       | -     |                                           |
| 168 | Pierisentkauran E                                                          | -                                    |                                              | -     |                                           |
| 169 | Rhodomicroside D                                                           | Acetic acid-Induced pain mouse model | Analgesic, 1.0 mg/kg                         | -     |                                           |
| 170 | Rhodomicroside E                                                           | Acetic acid-Induced pain mouse model | Analgesic, 1.0 mg/kg                         | -     |                                           |
| 171 | Pierisentkauran F                                                          | Acetic acid-Induced pain mouse model | Analgesic, 5.0 mg/kg                         | -     |                                           |
| 172 | Pierisjaponin H                                                            | Acetic acid-Induced pain mouse model | Analgesic, 5.0 mg/kg                         | -     |                                           |
| 173 | Pierisjaponin I                                                            | Acetic acid-Induced pain mouse model | Analgesic, 1.0 mg/kg                         | -     |                                           |
| 174 | 8 $\alpha$ -O-Acetyl rhodomollein XXIII                                    | Acetic acid-Induced pain mouse model | Analgesic, 5.0 mg/kg                         | -     |                                           |
| 175 | Rhodokalmanol A                                                            | Acetic acid-Induced pain mouse model | Analgesic, 1.0 mg/kg                         | -     |                                           |
| 176 | Rhodokalmanol B                                                            | Acetic acid-Induced pain mouse model | Analgesic, 5.0 mg/kg                         | -     |                                           |
| 177 | Rhodokalmanol C                                                            | Acetic acid-Induced pain mouse model | Analgesic, 0.04 mg/kg                        | -     |                                           |
| 178 | Rhodokalmanol D                                                            | Acetic acid-Induced pain mouse model | Analgesic, 0.2 mg/kg                         | -     |                                           |
| 179 | 16 $\alpha$ -acetoxy rhodomollein XXIII                                    | Acetic acid-Induced pain mouse model | Analgesic, 1.0 mg/kg                         | -     |                                           |
| 180 | Rhodomollein LI                                                            | -                                    |                                              | -     |                                           |
| 181 | Rhodoauriculatol E                                                         | Acetic acid-Induced pain mouse model | Analgesic, 5.0 mg/kg                         | -     |                                           |
| 182 | Mollebenzylanol A                                                          | -                                    |                                              | PTP1B | IC <sub>50</sub> 22.99 $\pm$ 0.43 $\mu$ M |
| 183 | Mollebenzylanol B                                                          | -                                    |                                              | PTP1B | IC <sub>50</sub> 32.24 $\pm$ 0.74 $\mu$ M |
| 184 | Rhododecorumin IV                                                          | Acetic acid-Induced pain mouse model | Analgesic, 10.0 mg/kg                        | -     |                                           |
| 185 | Rhododecorumin V                                                           | -                                    |                                              | -     |                                           |
| 186 | Micranthanone B                                                            | Acetic acid-Induced pain mouse model | Analgesic, 1.0 mg/kg                         |       |                                           |
| 187 | Micranthanone C                                                            | Acetic acid-Induced pain mouse model | Analgesic, 1.0 mg/kg                         |       |                                           |
| 188 | 14-epi-Mollanol A                                                          | Acetic acid-Induced pain mouse model | Analgesic, 5.0 mg/kg                         |       |                                           |
| 189 | Mollanol B                                                                 | Acetic acid-Induced pain mouse model | Analgesic, 5.0 mg/kg                         |       |                                           |

|            |                 |                                      |                      |   |  |
|------------|-----------------|--------------------------------------|----------------------|---|--|
| <b>190</b> | Mollanol C      | Acetic acid-Induced pain mouse model | Analgesic, 5.0 mg/kg |   |  |
| <b>191</b> | Pierisjaponin E | Acetic acid-Induced pain mouse model | Analgesic, 5.0 mg/kg | - |  |
| <b>192</b> | Rhomollone A    | -                                    |                      | - |  |
| <b>193</b> | Rhodauricanol A | Acetic acid-Induced pain mouse model | Analgesic, 0.2 mg/kg | - |  |

ND: Activity not detected; -: Didn't report in the literature.
